# Supplementary material
Source: PubMed Central journal article supplement (PMC2937514)
Supplement: supp_76_18_6077__1.pdf [file supp_76_18_6077__1.pdf]

**Table S1.** Bacterial strains used in this study.

| Bacterial strain or plasmid | Genotype/phenotype                                                                                                                      | Reference or source |
|-----------------------------|-----------------------------------------------------------------------------------------------------------------------------------------|---------------------|
| Strains                     |                                                                                                                                         |                     |
| <i>E. coli</i>              |                                                                                                                                         |                     |
| JM109                       | F'[traD36 proAB+ lacIq lacZ ΔM15] recA1 supE44 endA1 hsdR17 gyrA96 relA1 thi Δ(lac-proAB)                                               | (2)                 |
| TOP10                       | F <sup>-</sup> mcrA Δ (mrr-hsdRMS-mcrBC) Φ80lacZΔM15 ΔlacX74 recA1 araD139 Δ(ara-leu)7697 galU galK rpsL (Str <sup>R</sup> ) endA1 nupG | Invitrogen          |
| <i>M. xanthus</i>           |                                                                                                                                         |                     |
| DZF1                        | Wild type                                                                                                                               | (1)                 |
| JMCA                        | ΔcopA, Gal <sup>r</sup> , Km <sup>s</sup>                                                                                               | This study          |
| JMCB                        | ΔcopB, Gal <sup>r</sup> , Km <sup>s</sup>                                                                                               | This study          |
| JMCC                        | ΔcopC, Gal <sup>r</sup> , Km <sup>s</sup>                                                                                               | This study          |
| JMCAB                       | ΔcopA-ΔcopB, Gal <sup>r</sup> , Km <sup>s</sup>                                                                                         | This study          |
| JMCAC                       | ΔcopA-ΔcopC, Gal <sup>r</sup> , Km <sup>s</sup>                                                                                         | This study          |
| JMCBC                       | ΔcopB-ΔcopC, Gal <sup>r</sup> , Km <sup>s</sup>                                                                                         | This study          |
| JMCABC                      | ΔcopAΔcopBΔcopC, Gal <sup>r</sup> Km <sup>s</sup>                                                                                       | This study          |
| JMCAlac                     | copA-lacZ, Km <sup>r</sup>                                                                                                              | This study          |
| JMCBlac                     | copB-lacZ, Km <sup>r</sup>                                                                                                              | This study          |
| JMCClac1                    | copC-lacZ, Km <sup>r</sup>                                                                                                              | This study          |
| JMCClac2                    | copC-lacZ, Km <sup>r</sup>                                                                                                              | This study          |
| JMCClac3                    | copC-lacZ, Km <sup>r</sup>                                                                                                              | This study          |
| JMCABlac                    | copB-lacZ ΔcopA, Km <sup>r</sup>                                                                                                        | This study          |
| JMCBAlac                    | copA-lacZ ΔcopB, Km <sup>r</sup>                                                                                                        | This study          |
| JMCAclac1                   | copC-lacZ ΔcopA, Km <sup>r</sup>                                                                                                        | This study          |
| JMCBClac1                   | copC-lacZ ΔcopB, Km <sup>r</sup>                                                                                                        | This study          |
| JMCCAclac1                  | copA-lacZ ΔcopC, Km <sup>r</sup>                                                                                                        | This study          |
| JMCCBlac1                   | copB-lacZ ΔcopC, Km <sup>r</sup>                                                                                                        | This study          |
| JMCABCus1lac                | ΔcopAΔcopB, cus1-lacZ                                                                                                                   | This study          |
| JMCABCus2lac                | ΔcopAΔcopB, cus2-lacZ                                                                                                                   | This study          |
| JMCABCus3lac                | ΔcopAΔcopB, cus3-lacZ                                                                                                                   | This study          |

1. **Morrison, C. E., and D. R. Zusman.** 1979. *Myxococcus xanthus* mutants with temperature-sensitive, stage-specific defects: evidence for independent pathways in development. *J Bacteriol* **140**:1036-1042.
2. **Yanisch-Perron, C., J. Vieira, and J. Messing.** 1985. Improved M13 phage cloning vectors and host strains: nucleotide sequences of the M13mp18 and pUC19 vectors. *Gene* **33**:103-119.

**Table S2.** Plasmids used in this study.

| Plasmids    | Features                           | Reference or source |
|-------------|------------------------------------|---------------------|
| pBJ113      | <i>galK</i> , Km <sup>r</sup>      | (2)                 |
| pKY481      | <i>lacZY</i> , Km <sup>r</sup>     | (1)                 |
| pAELCA      | $\Delta copA$ , Km <sup>r</sup>    | This study          |
| pAELCB      | $\Delta copB$ , Km <sup>r</sup>    | This study          |
| pAELCC      | $\Delta copC$ , Km <sup>r</sup>    | This study          |
| pAELCAlac   | <i>copA-lacZ</i> , Km <sup>r</sup> | This study          |
| pAELCBlac   | <i>copB-lacZ</i> , Km <sup>r</sup> | This study          |
| pAELCClac1  | <i>copC-lacZ</i> , Km <sup>r</sup> | This study          |
| pAELCClac2  | <i>copC-lacZ</i> , Km <sup>r</sup> | This study          |
| pAELCClac3  | <i>copC-lacZ</i> , Km <sup>r</sup> | This study          |
| pAELCus1lac | <i>cus1-lacZ</i> , Km <sup>r</sup> | (3)                 |
| pAELCus2lac | <i>cus2-lacZ</i> , Km <sup>r</sup> | (3)                 |
| pAELCus3lac | <i>cus3-lacZ</i> , Km <sup>r</sup> | (3)                 |

1. **Cho, K., and D. R. Zusman.** 1999. AsgD, a new two-component regulator required for A-signalling and nutrient sensing during early development of *Myxococcus xanthus*. *Mol Microbiol* **34**:268-281.
2. **Julien, B., A. D. Kaiser, and A. Garza.** 2000. Spatial control of cell differentiation in *Myxococcus xanthus*. *Proc Natl Acad Sci USA* **97**:9098-9103.
3. **Moraleda-Muñoz, A., J. Perez, A. L. Extremera, and J. Muñoz-Dorado.** 2010. Complexity of the *Myxococcus xanthus* copper response: differential regulation of six CBA-type heavy metal efflux systems. *Appl Env Microbiol* **companion manuscript accepted for publication.**

**Table S3.** Oligonucleotides used in this study.

| Oligonucleotide | For amplification of                                         | Sequence (5'→3') <sup>a</sup> |
|-----------------|--------------------------------------------------------------|-------------------------------|
| 3415Kpn         | Upstream of <i>copA</i> (pAELCA and pAELCA <sub>lac</sub> )  | GAGGGTACCGCGCTGGCCACGAAAATGAT |
| 3415Bam1        | Upstream of <i>copA</i> (pAELCA and pAELCA <sub>lac</sub> )  | CCTGGGGATCCACGAACATG          |
| 3415Bam2        | Downstream of <i>copA</i> (pAELCA)                           | CGCGGATCCGAGCATCTCGTCCGTCTCCG |
| 3415Hin         | Downstream of <i>copA</i> (pAELCA)                           | CCAAAGCTTGAGTCAACAGGGCGAGGGTC |
| 3422Kpn         | Upstream of <i>copB</i> (pAELCB and pAELCB <sub>lac</sub> )  | CGAGGTACCTGATGTGGTCCATCGCGCAG |
| 3422Bam1        | Upstream of <i>copB</i> (pAELCB and pAELCB <sub>lac</sub> )  | ACGGGATCCATGGGGCTTCCTCCTGCC   |
| 3422Bam2        | Downstream of <i>copB</i> (pAELCB)                           | GTCGGATCCGCTCAACAGCCTGCGTCTGC |
| 3422Hin         | Downstream of <i>copB</i> (pAELCB)                           | GCAAAGCTTGAAGTGGGCGACGTGGAATC |
| 0979Kpn         | Upstream of <i>copC</i> (pAELCC and pAELCC <sub>lac1</sub> ) | CCGGGTACCAGGCAGTACGCCAGCTTCC  |
| 0979Bam1        | Upstream of <i>copC</i> (pAELCC and pAELCC <sub>lac1</sub> ) | TGTGGATCCATGGCGCTTCGAGGCTCCT  |
| 0979Bam2        | Downstream of <i>copC</i> (pAELCC)                           | GTCGGATCCCGTCATCGGCAATGCGCTC  |
| 0979Hin         | Downstream of <i>copC</i> (pAELCC)                           | CAGAAGCTTGTCTCCCAGCTCACTC     |
| 0979Bam3        | Upstream of <i>copC</i> (pAELCC <sub>lac2</sub> )            | TTCGGATCCACCTTCATGCCGCAGAC    |
| 0979Kpn2        | Upstream of <i>copC</i> (pAELCC <sub>lac3</sub> )            | CACGGTACCAGATGAGCACCGTGCCAG   |
| 0979Bam4        | Upstream of <i>copC</i> (pAELCC <sub>lac3</sub> )            | TGTGGATCCGCCCGCGGCAGCAGTGTGGC |
| CopCcDNA        | Synthesis of cDNA including <i>copC</i>                      | ATTGCCGATGACGGACACCG          |
| CopCF           | Inside <i>copC</i>                                           | GAATGGGAGAGGACGGTCAC          |
| CopCR           | Inside <i>copC</i>                                           | CACAGGGGCAGGCAATGATG          |

<sup>a</sup>The restriction sites used for cloning are underlined.
